# Supplementary material for: The resistant effect of SIRT1 in oxidative stress-induced senescence of rat nucleus pulposus cell is regulated by Akt-FoxO1 pathway
Source: Oxford University Press journal article supplement (doi:10.1042/bsr20190112), 2019-04-09
Supplement: bsr-2019-0112_supp.pdf [file bsr-2019-0112_supp.pdf]

**Table 1.** Real-time PCR primers

| <b>Target gene</b> | <b>Forward primer</b>    | <b>Reverse primer</b>    |
|--------------------|--------------------------|--------------------------|
| SIRT1              | TGACCTCCTCATTGTTATTGG    | GGCATACTCGCCACCTAA       |
| p53                | ATGCTGAGTATCTGGACGACA    | CAGGCACAAACACGAACC       |
| p21                | AGAACGGTGGAACCTTTGACT    | GATAGAAATCTGTTAGGCTGGT   |
| p16                | TGATGGGCAACGTCAAAG       | AGTAGATACCGCAAATACCG     |
| TNF- $\alpha$      | CCACGCTCTTCTGTCTACTG     | GCTACGGGCTTGTCCTC        |
| IL-1 $\beta$       | TGTGATGTTCCCATTAGAC      | AATACCACTTGTTGGCTTA      |
| IL-6               | TGCCTTCTTGGGACTGAT       | TTGCCATTGCACAACCTCT      |
| IL-8               | ACGCTGGCTTCTGACAACACTAGT | CCTCTCTGTCCTGAGACGAGAAGG |
| GAPDH              | GCAAGTTCAACGGCACAG       | GCCAGTAGACTCCACGACAT     |
